# Supplementary material
Source: PubMed Central journal article supplement (PMC1924541)
Supplement: pnas_0700531104_1.pdf [file pnas_0700531104_1.pdf]

... 10 20 30 40 50 60 70 80 90 100 110 120 130 140 150 160 170 180 190 200 210 220 ...  
REC-2 ...  
REC-3 ...  
REC-29 ...  
REC-45 ...  
REC-14 ...  
REC-11 ...  
REC-28 ...  
REC-37 ...  
REC-49 ...  
REC-76 ...  
REC-III ...  
REC-4 ...  
REC-10 ...  
REC-15 ...  
REC-25 ...  
REC-38 ...  
REC-41 ...  
REC-44 ...  
REC-64 ...  
REC-73 ...  
REC-77 ...  
REC-80 ...  
REC-89 ...  
REC-95 ...  
REC-96 ...  
REC-IV ...  
REC-A ...  
REC-18 ...  
REC-20 ...  
REC-30 ...  
REC-65 ...  
REC-94 ...  
REC-99 ...  
REC-V ...  
REC-5 ...  
REC-39 ...

... 230 240 250 260 270 280 290 300 310 320 330 340 350 360 370 380 390 400 410 ...  
REC-2 ...  
REC-1 ...  
REC-29 ...  
REC-45 ...  
REC-14 ...  
REC-11 ...  
REC-28 ...  
REC-37 ...  
REC-49 ...  
REC-76 ...  
REC-III ...  
REC-4 ...  
REC-6 ...  
REC-15 ...  
REC-25 ...  
REC-27 ...  
REC-38 ...  
REC-41 ...  
REC-44 ...  
REC-52 ...  
REC-73 ...  
REC-77 ...  
REC-78 ...  
REC-80 ...  
REC-85 ...  
REC-86 ...  
REC-91 ...  
REC-96 ...  
REC-IV ...  
REC-18 ...  
REC-20 ...  
REC-23 ...  
REC-65 ...  
REC-94 ...  
REC-99 ...  
REC-V ...  
REC-5 ...  
REC-39 ...
